# Supplementary material for: Identifying the Preferred Subset of Enzymatic Profiles in Nonlinear Kinetic Metabolic Models via Multiobjective Global Optimization and Pareto Filters
Source: PubMed Central journal article supplement (PMC3447875; doi:10.1371/journal.pone.0043487), 2012-09-20
Supplement: pone.0043487.s001.pdf [file pone.0043487.s001.pdf]

# Nomenclature S1

## Abbreviations

|       |                                               |
|-------|-----------------------------------------------|
| FBA   | Flux Balance Analysis                         |
| GMA   | Generalized Mass Action                       |
| LB    | Lower Bound                                   |
| LP    | Linear Programming problem                    |
| MCDM  | Multi-criteria decision-making                |
| MILP  | Mixed-Integer Linear Programming problem      |
| MOO   | Multiobjective Optimization                   |
| moNLP | Multiobjective Non-Linear Programming problem |
| NLP   | Non-Linear Programming problem                |
| OG    | Optimality gap                                |
| UB    | Upper Bound                                   |

## Indices

|     |                                               |
|-----|-----------------------------------------------|
| $e$ | subintervals in the epsilon-constraint method |
| $i$ | dependent (internal) metabolites              |
| $j$ | metabolites (dependent + independent)         |
| $r$ | flows                                         |
| $b$ | objectives                                    |

## Sets/Subsets

|        |                                                                      |
|--------|----------------------------------------------------------------------|
| $FP$   | set of metabolites $i$ that are regarded as final products           |
| $FP_i$ | set of processes $r$ contributing to the synthesis of metabolite $i$ |
| $SOC$  | set of candidate solutions $s$                                       |
| $SOR$  | set of rejected solutions $s$                                        |
| $SOS$  | set of normalized Pareto solutions $s$                               |

## Parameters

|                |                                                                              |
|----------------|------------------------------------------------------------------------------|
| $NO$           | total number of objectives $b$                                               |
| $E$            | total number of subintervals $e$ in the epsilon-constraint method            |
| $f_{rj}$       | kinetic order of metabolite $j$ in process $r$                               |
| $K_r^{LB}$     | Lower bound on fold-change in the activity of enzyme $r$                     |
| $K_r^{UB}$     | Upper bound on fold-change in the activity of enzyme $r$                     |
| $m$            | total number of independent (external) metabolites $j$                       |
| $n$            | total number of dependent (internal) metabolites $i$                         |
| $NS$           | total number of normalized Pareto solutions $s$                              |
| $p$            | total number of flows $r$                                                    |
| $Q$            | order of efficiency of a Pareto optimal solution $s$                         |
| $X_i^{LB}$     | lower bound on the concentration of metabolite $i$                           |
| $X_i^{UB}$     | upper bound on the concentration of metabolite $i$                           |
| $\Delta t$     | tolerance control parameter for Smart Pareto filter                          |
| $\epsilon_b^e$ | lower bound of subinterval $e$ of objective $b$ in epsilon-constraint method |
| $\gamma_r$     | basal state activity of enzyme governing process $r$                         |
| $\mu_{ir}$     | stoichiometric coefficient of metabolite $i$ in reaction $r$                 |

## Variables

|            |                                                                           |
|------------|---------------------------------------------------------------------------|
| $f_b$      | value of individual objective $b$                                         |
| $f_{s,b}$  | value of individual objective $b$ in solution $s$                         |
| $fn_{s,b}$ | normalized value of individual objective $b$ in solution $s$              |
| $FN_s$     | vector containing the normalized values of all objectives in solution $s$ |
| $K_r$      | fold-change over the basal activity of enzyme $r$                         |
| $X_i$      | concentration of metabolite $i$                                           |
| $t$        | time                                                                      |
| $v_r$      | velocity of process $r$                                                   |
